# Supplementary material for: Imputation-Based Population Genetics Analysis of Plasmodium falciparum Malaria Parasites
Source: PubMed Central journal article supplement (PMC4415759; doi:10.1371/journal.pgen.1005131), 2015-04-30
Supplement: pgen.1005131.s001.pdf [file pgen.1005131.s001.pdf]

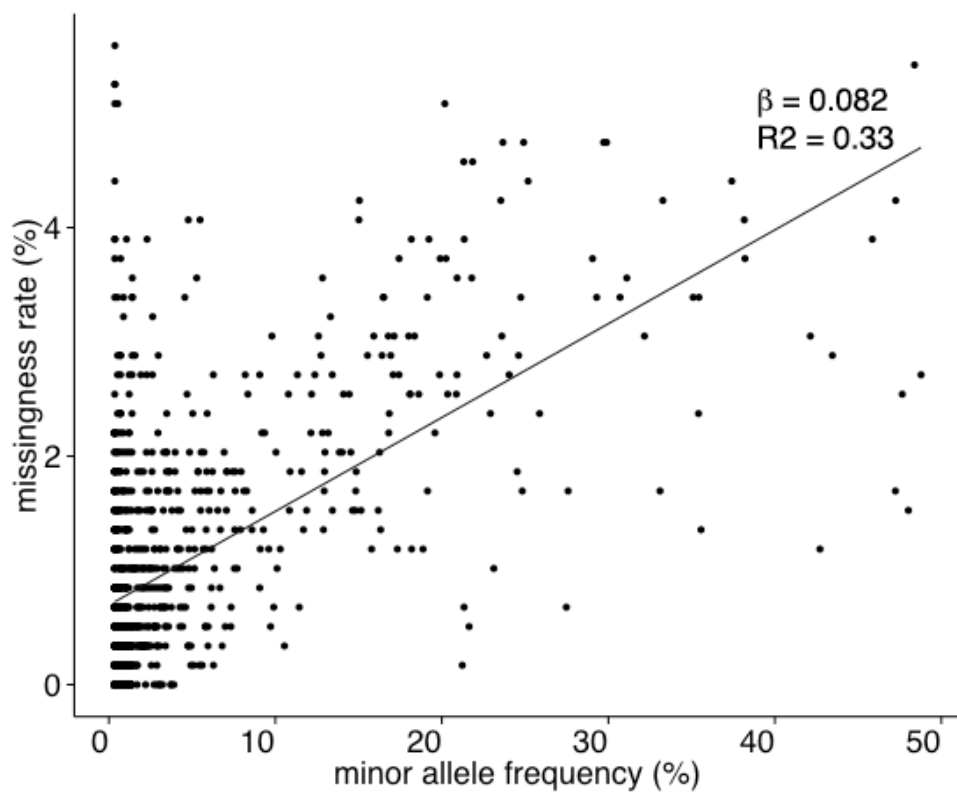

**S. Figure 1.** For a sample of 1,000 SNPs (in the 86k set), there is a significant linear relationship between SNP minor allele frequency and percentage of missing genotypes ( $P < 2 \times 10^{-16}$ ).
