# Supplementary material for: Imputation-Based Population Genetics Analysis of Plasmodium falciparum Malaria Parasites
Source: PubMed Central journal article supplement (PMC4415759; doi:10.1371/journal.pgen.1005131), 2015-04-30
Supplement: pgen.1005131.s004.pdf [file pgen.1005131.s004.pdf]

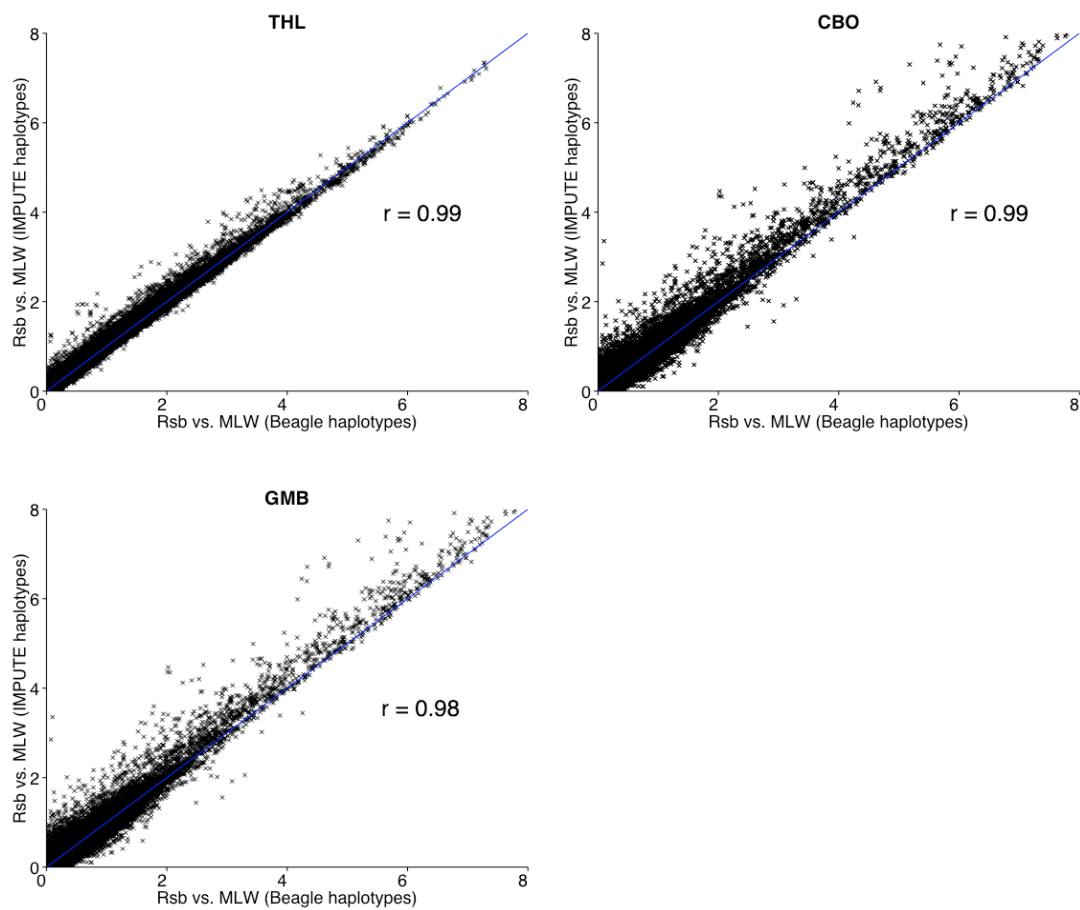

**S. Figure 4.** Pearson's correlation ( $r$ ) between  $Rsb$  metrics calculated from Beagle- or IMPUTE-imputed haplotypes. Malawi is used as the reference population. Diagonal line indicates line of equality. Mass of points above the line indicates that IMPUTE-derived haplotypes systematically produce larger  $Rsb$  values than Beagle-derived haplotypes.
