# Supplementary material for: Imputation-Based Population Genetics Analysis of Plasmodium falciparum Malaria Parasites
Source: PubMed Central journal article supplement (PMC4415759; doi:10.1371/journal.pgen.1005131), 2015-04-30
Supplement: pgen.1005131.s006.pdf [file pgen.1005131.s006.pdf]

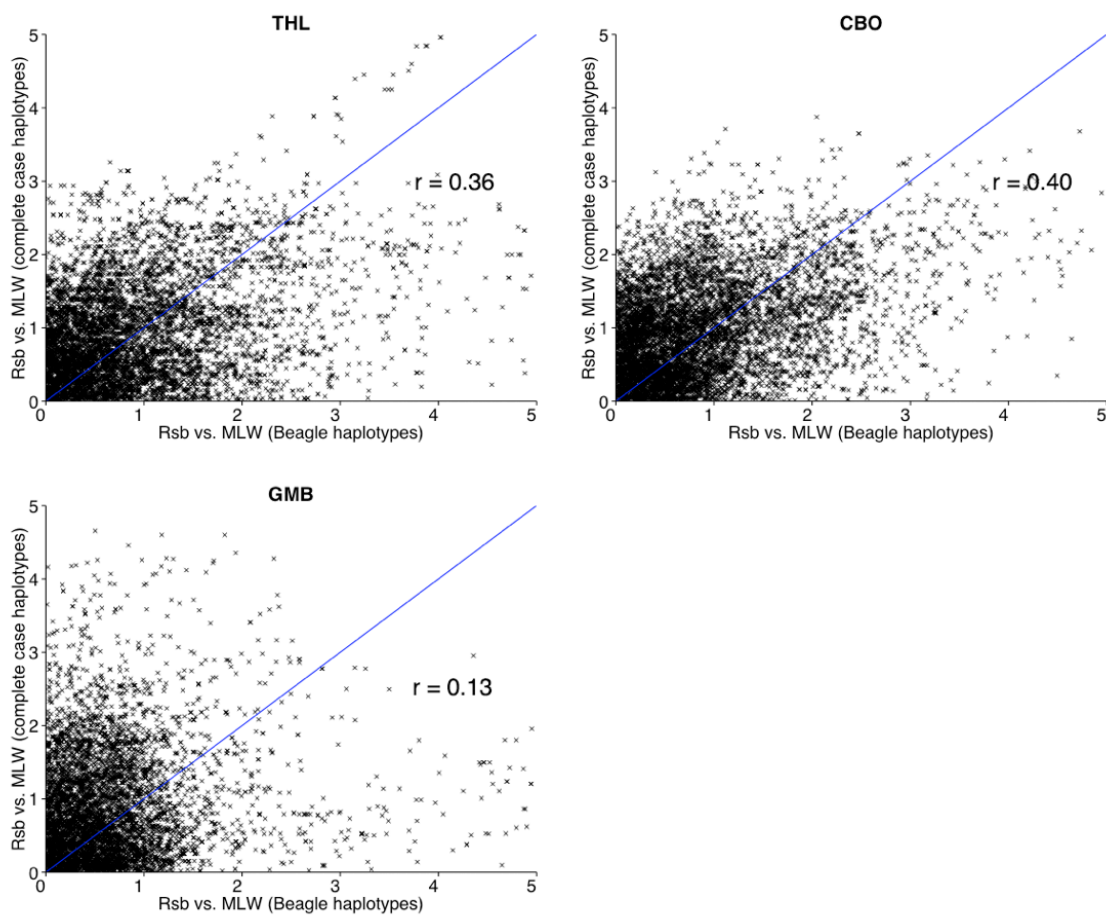

**S. Figure 6.** Pearson's correlation ( $r$ ) between *Rsb* metrics calculated from Beagle-imputed or complete-case haplotypes. Malawi (MLW) is used as the reference population. Diagonal line indicates line of equality.
