# Supplementary material for: Imputation-Based Population Genetics Analysis of Plasmodium falciparum Malaria Parasites
Source: PubMed Central journal article supplement (PMC4415759; doi:10.1371/journal.pgen.1005131), 2015-04-30
Supplement: pgen.1005131.s007.pdf [file pgen.1005131.s007.pdf]

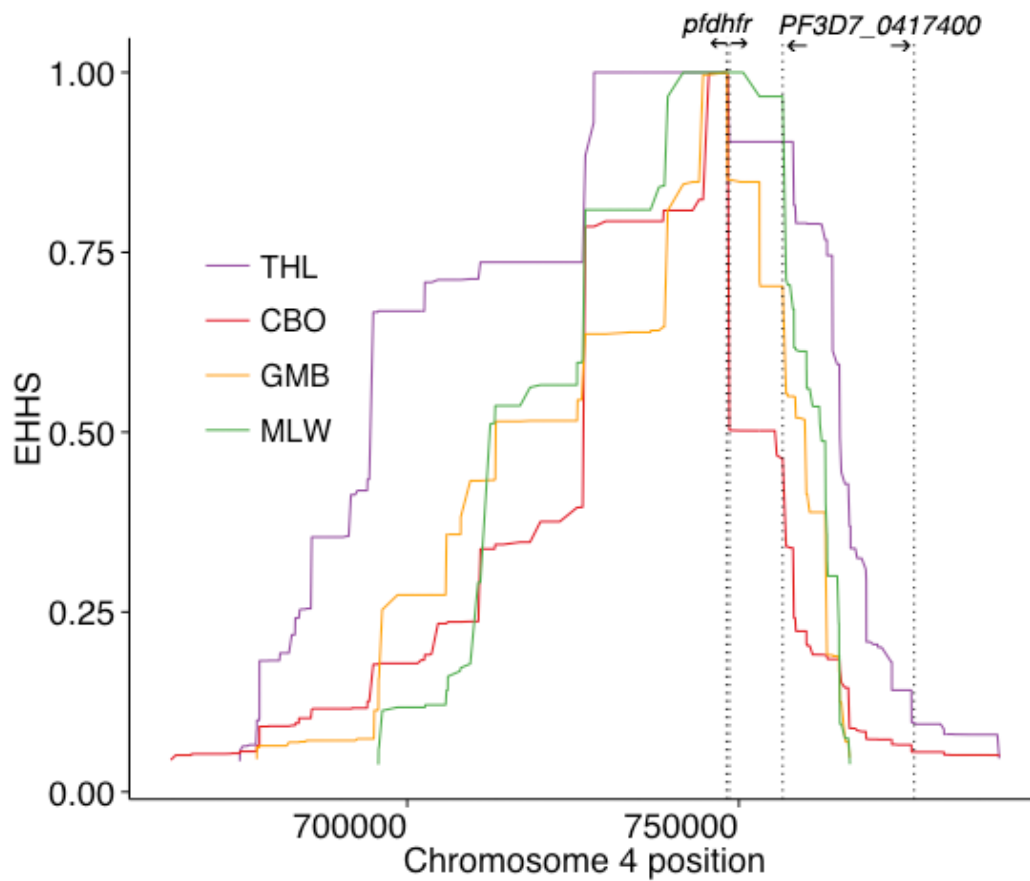

**S. Figure 7.** Analysis of site-specific EHH around a core SNP within *dhfr*. With Malawi as the reference population, *Rsb* metrics indicate no signal for positive selection in *dhfr* but do indicate a signal for positive selection in neighbouring *PF3D7\_0417400*. It appears that the beneficial allele is sweeping up in all 4 populations, causing attenuation of inter-population differences at *dhfr*. The longest haplotypes appear to occur in Thailand, producing the strongest signal in *PF3D7\_0417400*.
