# Supplementary material for: Imputation-Based Population Genetics Analysis of Plasmodium falciparum Malaria Parasites
Source: PubMed Central journal article supplement (PMC4415759; doi:10.1371/journal.pgen.1005131), 2015-04-30
Supplement: pgen.1005131.s008.pdf [file pgen.1005131.s008.pdf]

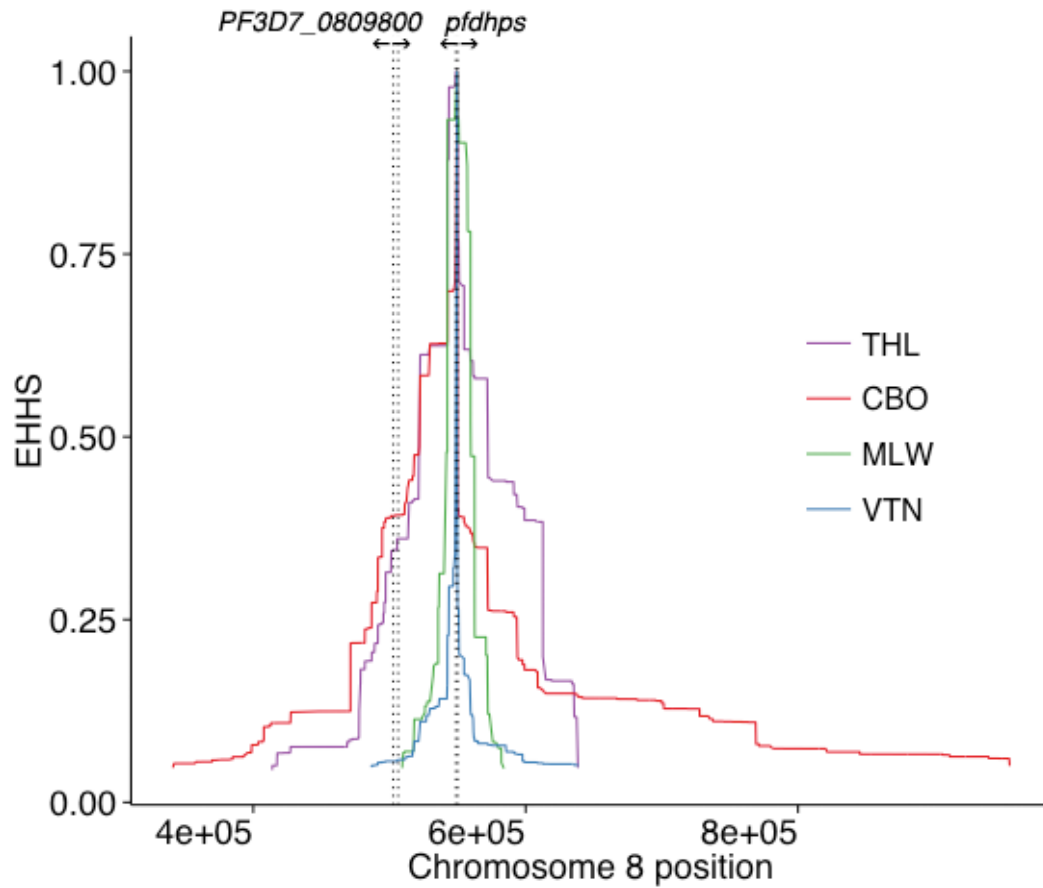

**S. Figure 8.** Analysis of site-specific EHH around a core SNP within *dhps*. With Malawi as the reference population, *Rsb* metrics in Thai and Cambodian populations indicate no signal for positive selection in *dhps* but do indicate a strong signal for positive selection in neighbouring *PF3D7\_0809800*. In contrast, *dhps* is detected by using Vietnam (VTN) as the reference population.
