# Supplementary material for: Imputation-Based Population Genetics Analysis of Plasmodium falciparum Malaria Parasites
Source: PubMed Central journal article supplement (PMC4415759; doi:10.1371/journal.pgen.1005131), 2015-04-30
Supplement: pgen.1005131.s009.pdf [file pgen.1005131.s009.pdf]

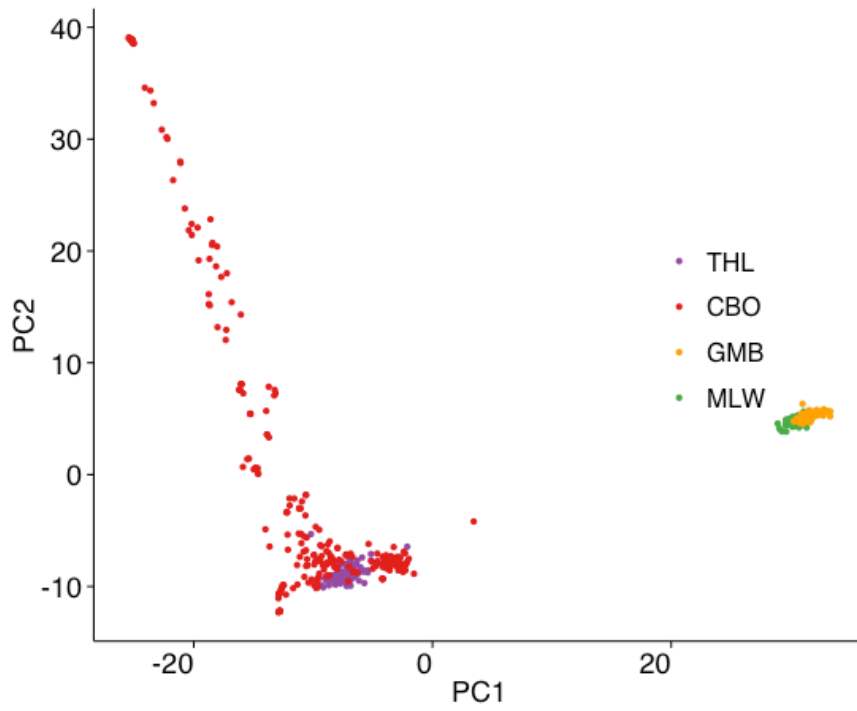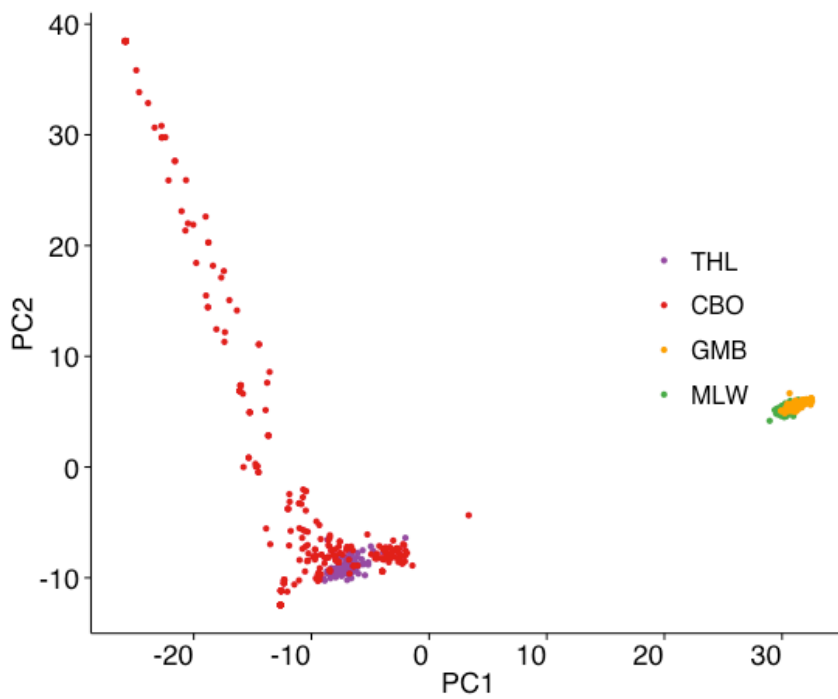

**S. Figure 9.** Principal components analysis of *P. falciparum* isolates using unimputed (top) and Beagle-imputed (bottom) SNP data. PC1 and PC2 refer to the first and second principal components, respectively.
