# Supplementary material for: Imputation-Based Population Genetics Analysis of Plasmodium falciparum Malaria Parasites
Source: PubMed Central journal article supplement (PMC4415759; doi:10.1371/journal.pgen.1005131), 2015-04-30
Supplement: pgen.1005131.s010.pdf [file pgen.1005131.s010.pdf]

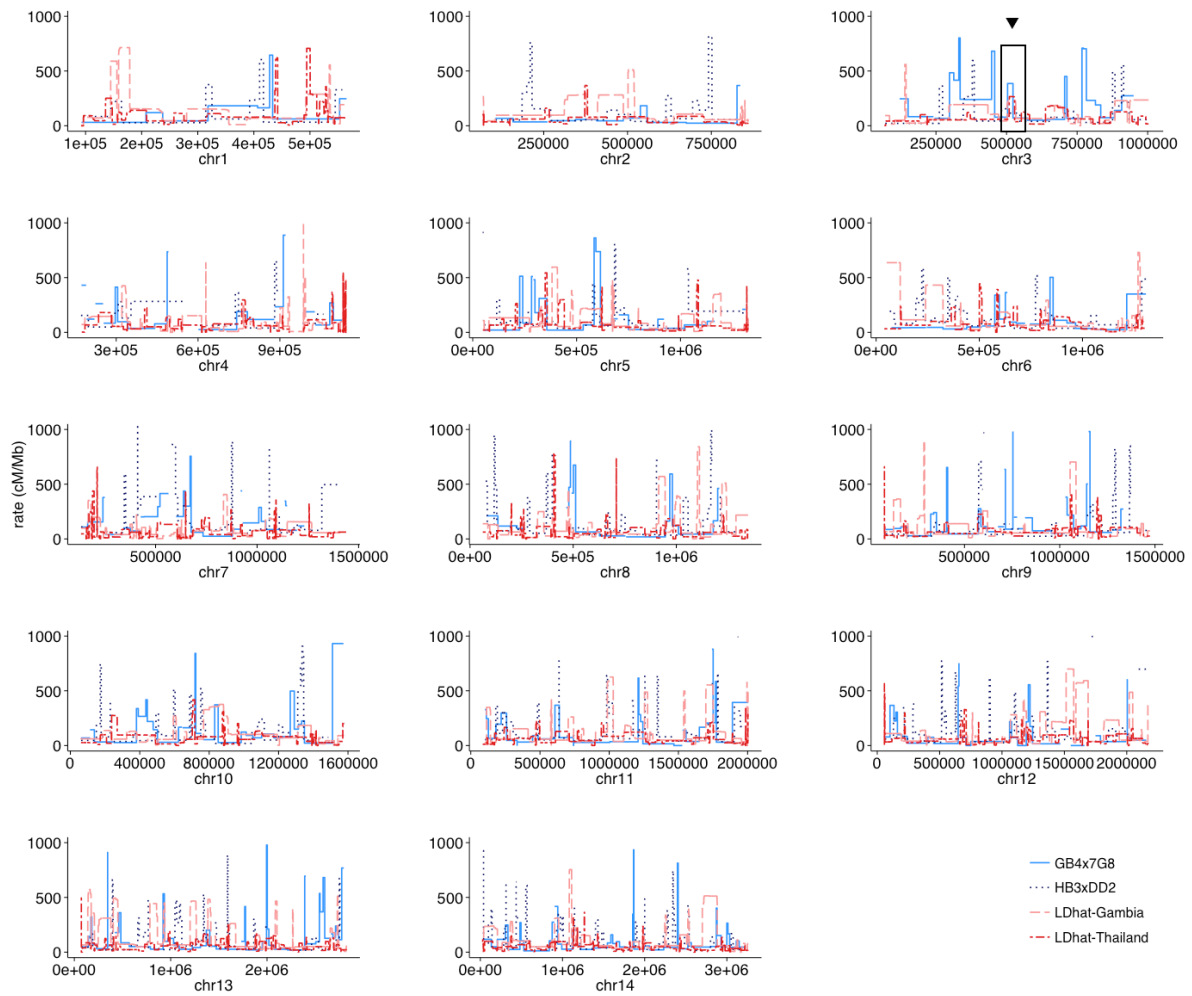

**S. Figure 10.** Recombination maps from experimental crosses (GB4x7G8 and HB3xDD2) and LDhat inference (Gambia and Thailand). The chromosomes are ordered from 1-14 by row. The highlighted inset shows putative recombination hotspot in the middle of chromosome 3, validated in Mu (47), appearing in the GB4x7G8, LDhat Gambia and Thailand maps.
