# Supplementary material for: Imputation-Based Population Genetics Analysis of Plasmodium falciparum Malaria Parasites
Source: PubMed Central journal article supplement (PMC4415759; doi:10.1371/journal.pgen.1005131), 2015-04-30
Supplement: pgen.1005131.s011.pdf [file pgen.1005131.s011.pdf]

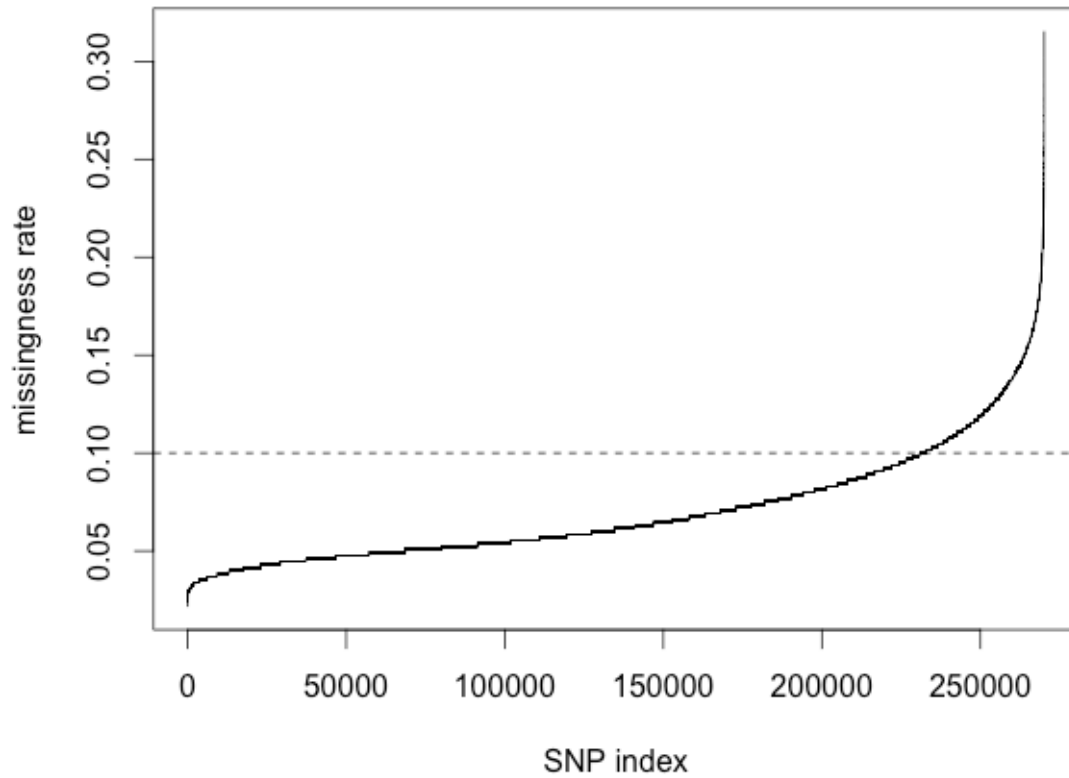

**S. Figure 11.** SNPs ordered according to the proportion of missing genotypes (“missingness rate”) calculated prior to data filtering. A 10% cut-off based on an approximate inflection point was used.
